# Supplementary material for: Fractional order memcapacitive neuromorphic elements reproduce and predict neuronal function
Source: PubMed Central journal article supplement (PMC10925066; doi:10.1038/s41598-024-55784-1), 2024-03-09
Supplement: 41598_2024_55784_MOESM1_ESM.pdf [file 41598_2024_55784_MOESM1_ESM.pdf]

# Supplementary materials

## Fractional order memcapacitive neuromorphic elements reproduce and predict neuronal function

Patricia Vazquez-Guerrero<sup>1</sup>, Rohisha Tuladhar<sup>1</sup>, Costas Psychalinos<sup>2</sup>, Ahmed Elwakil<sup>3,4</sup>, Maurice J. Chacron<sup>5</sup>, and Fidel Santamaria<sup>1\*</sup>

1 Department of Neuroscience, Developmental and Regenerative Biology. The University of Texas at San Antonio, San Antonio, Texas 78349.

2 Department of Physics, University of Patras, Greece.

3 Department of Electrical and Computer Engineering, University of Sharjah, PO Box 27272, Sharjah, UAE

4 Department of Electrical and Software Engineering, University of Calgary, T2N 1N4, Alberta, Canada

5 Department of Physiology, McGill University, Quebec, Canada H3G 1Y6

\* Corresponding author: fidel.santamaria@utsa.edu

### **Action potentials generated by the classical Hodgkin-Huxley circuit and computer model**

We implemented a circuit that replicated the Hodgkin-Huxley model. We also implemented the computer model (see Methods) and compared the spike shapes generated by both under constant current stimulation (Fig. S1).

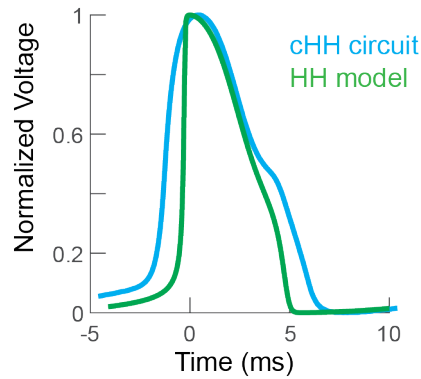

**Figure S1.** Spikes generated by the circuit (cyan) and computer model (green) of the Hodgkin-Huxley system of equations.

## Fractional order of super-capacitors used in the Hodgkin-Huxley circuit

Following the same measurements performed in the main text we measured the fractional derivative order of a super-capacitor stack (Fig. S2).

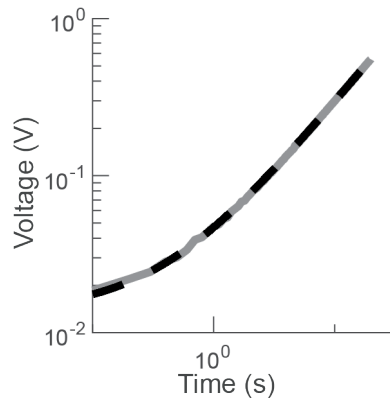

**Figure S2.** Voltage across a stack of super-capacitors after a current step stimulus. Measurement in black, fit from analytical solution in dashed gray.

## The complex spikes in the fractional order Hodgkin-Huxley circuit and model

In what we describe as the critical state of the fractional Hodgkin-Huxley circuit the system generates complex spikes. The complex spikes were replicated with the computer model when considering fractional order dynamics in the n-gate (Fig. S3). The phase plane analysis shows two distinct oscillatory patterns that are consistent with a canard (Fig. S4). See main text for details.

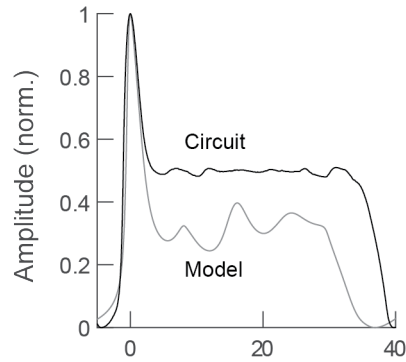

**Figure S3.** Complex spikes generated by the fractional order Hodgkin-Huxley circuit and computer model. The fractional order was implemented in the n-gate in both cases.

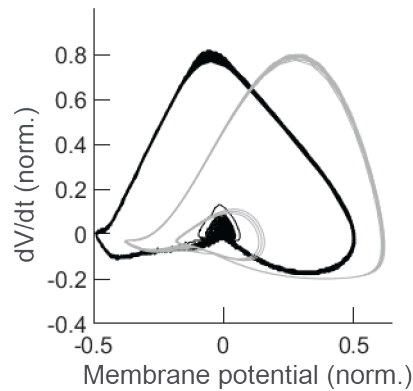

**Figure S4.** Phase plane analysis of the complex spikes generated by the Hodgkin-Huxley circuit (black) and compute model (gray).

## The CMOS circuit

We used a CMOS implementation of the mathematical description of a fractional order capacitor. A photograph of the circuit and general description are in Figure S5. A detailed explanation has been previously published(1).

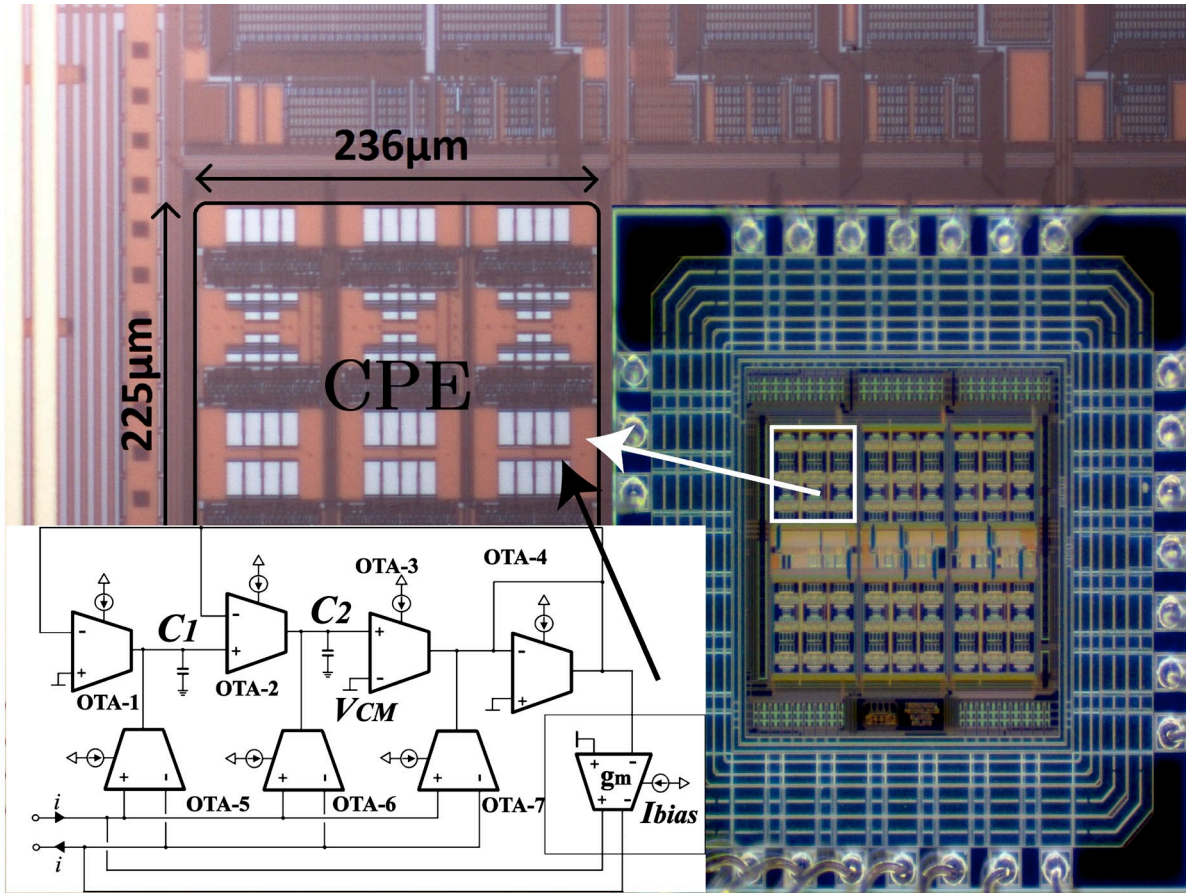

**Figure S5.** The fractional order CMOS circuit.

## Implementing the fractional Hodgkin-Huxley circuit using other fractional order materials

It is widely known that fruits, plants, and vegetables have fractional order capacitance(2-7). We implemented the fractional Hodgkin-Huxley (HH) circuit using a pitted prune (Sunsweet, CA). The fractional order of the pitted prune was  $0.67 \pm 0.03$  95% *CI*. We connected the prune to the circuit by inserting electrodes on the prune. For one configuration (Fig S6A) we needed to inject current in the hundreds of micro-Amperes to generate spikes (Fig. S6B). Depending on the input current the inter-spike interval (ISI) varied randomly (Fig. S6C). In contrast with the super-capacitor circuit the firing rate decreased as a function of input current with an increase in the variability (Fig. S6E). We repeated the measurements in a second configuration with electrodes farther apart (Fig. S6F). In this configuration we used less than  $8 \mu A$  to generate action potential that resembled complex spikes (Fig. S6G). As in the first configuration, the ISI appeared random (Fig. S6H) and had a long tail distribution (Fig. S6I). The firing rate decayed as a function of input current (Fig. S6J).

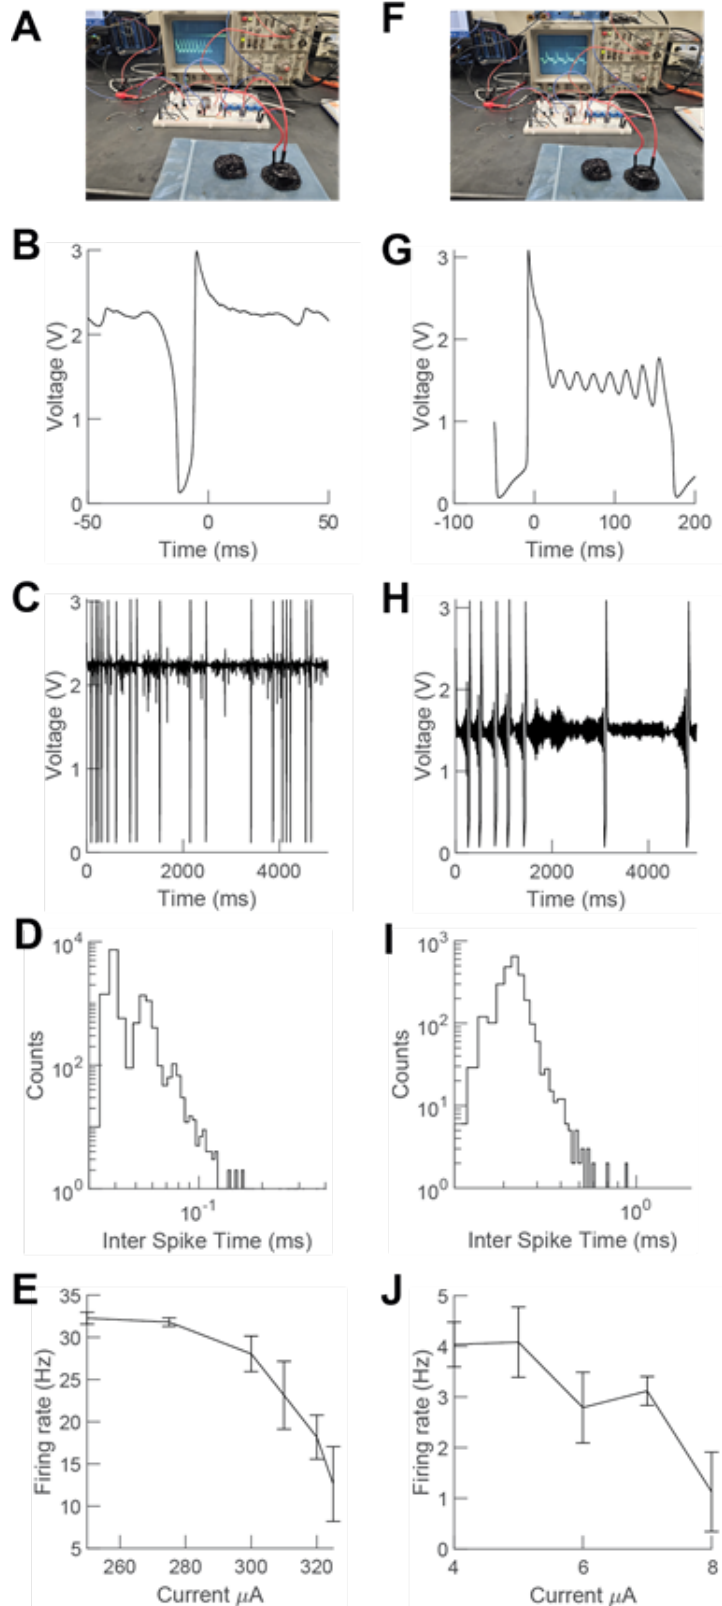

**Figure S6.** The fractional order Hodgkin-Huxley circuit with a dried fruit. A) The circuit generated spikes when connected to a dried pitted prune. B) The circuit generated action potentials. C) The spike trains showed random activity. D) The inter-spike-interval. E) The average firing rate as a function of input current. F-J) same measurements as in A-E when the electrodes were inserted farther apart on the prune.

1. Tsirimokou G, Psychalinos C, Elwakil AS, Salama KN. Electronically tunable fully integrated fractional-order resonator. *IEEE Transactions on Circuits and Systems II: Express Briefs*. 2017;65(2):166-70.
2. Elwakil AS. Fractional-order circuits and systems: An emerging interdisciplinary research area. *IEEE Circuits and Systems Magazine*. 2010;10(4):40-50.
3. AboBakr A, Said LA, Madian AH, Elwakil AS, Radwan AG. Experimental comparison of integer/fractional-order electrical models of plant. *AEU-International Journal of Electronics and Communications*. 2017;80:1-9.
4. Jesus IS, Tenreiro Machado J, Boaventure Cunha J. Fractional electrical impedances in botanical elements. *Journal of Vibration and Control*. 2008;14(9-10):1389-402.
5. Roy A, Mallick A, Das S, Aich A. An experimental method of bioimpedance measurement and analysis for discriminating tissues of fruit or vegetable. *AIMS Biophysics*. 2020;7(1).
6. Gadallah SI, Ghoneim MS, Elwakil AS, Said LA, Madian AH, Radwan AG. Plant Tissue Modelling Using Power-Law Filters. *Sensors*. 2022;22(15):5659.
7. Mohsen M, Said LA, Madian AH, Radwan AG, Elwakil AS. Fractional-order bio-impedance modeling for interdisciplinary applications: A review. *IEEE Access*. 2021;9:33158-68.
